# Supplementary material
Source: PubMed Central journal article supplement (PMC4576684)
Supplement: supp_mol.115.099689_Supplemental_99689.pdf [file supp_mol.115.099689_Supplemental_99689.pdf]

## MOLECULAR PHARMACOLOGY

### Supplemental Data

#### **POTENTIATORS OF DEFECTIVE $\Delta$ F508-CFTR CHANNEL GATING THAT DO NOT INTERFERE WITH CORRECTOR ACTION**

Puay-Wah Phuan, Guido Veit, Joseph Tan, Walter E. Finkbeiner, Gergely L. Lukacs, and A.S. Verkman

**Supplemental Table 1.** EC<sub>50</sub> and percentage VX-809 correction of indicated potentiators

**Supplemental Table 2.** Structure-activity analysis of class A analogs.

**Supplemental Table 3.** Structure-activity analysis of class H analogs.

**Supplemental Table 4.** Structure-activity analysis of P5 analogs.

**Supplemental Table 1.** EC<sub>50</sub> and percentage VX-809 correction of indicated potentiators.

| Class | EC <sub>50</sub> (μM) | VX-809 % correction |
|-------|-----------------------|---------------------|
| A01   | 0.05                  | 87 ± 5              |
| A02   | 0.03                  | 90 ± 8              |
| B01   | 0.6                   | 108 ± 7             |
| C01   | 0.7                   | 86 ± 5              |
| D01   | 0.5                   | 105 ± 10            |
| E01   | 0.9                   | 107 ± 6             |
| F01   | 0.7                   | 86 ± 5              |
| G01   | 0.9                   | 105 ± 5             |
| H01   | 0.4                   | 95 ± 6              |
| H02   | 0.2                   | 85 ± 5              |
| H03   | 1.1                   | 80 ± 5              |
| I01   | 0.5                   | 85 ± 5              |

EC<sub>50</sub> as determined from plate-reader fluorescence assay using FRT-ΔF508-YFP cells. 100% VX-809 correction is defined as background-subtracted luminescence signal of VX-809-corrected ΔF508-HRP CFBE cells.

**Supplemental Table 2.** Structure-activity analysis of class A analogs.

| Class A | Structure                                                                           | EC <sub>50</sub> (nM) | VX-809 % Correction |
|---------|-------------------------------------------------------------------------------------|-----------------------|---------------------|
| A03     | 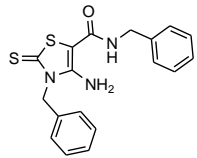   | 25                    | 95 ± 6              |
| A04     |    | 18                    | 83 ± 7              |
| A05     |    | 35                    | 101 ± 8             |
| A06     |    | 760                   | 88 ± 5              |
| A07     |   | 37                    | 94 ± 6              |
| A08     |  | 910                   | 90 ± 4              |
| A09     |  | 940                   | 105 ± 5             |

**Supplemental Table 3.** Structure-activity analysis of class H analogs.

| Class H | Structure                                                                           | EC <sub>50</sub> (μM) | VX-809 % Correction |
|---------|-------------------------------------------------------------------------------------|-----------------------|---------------------|
| H04     | 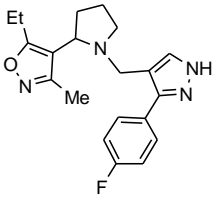   | 0.6                   | 87 ± 8              |
| H05     |    | 0.4                   | 93 ± 5              |
| H06     |    | 2.0                   | 82 ± 6              |
| H08     |  | 0.6                   | 91 ± 5              |
| H09     |  | 1.1                   | 84 ± 5              |
| H10     |  | 1.0                   | 84 ± 6              |

**Supplemental Table 4.** Structure-activity analysis of P5 analogs.

| P5 analogs | Structure                                                                           | EC <sub>50</sub> (nM) | VX-809 % Correction |
|------------|-------------------------------------------------------------------------------------|-----------------------|---------------------|
| P11        | 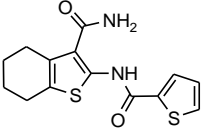   | 58                    | 107 ± 4             |
| P12        |    | 42                    | 108 ± 2             |
| P14        |    | 250                   | 106 ± 7             |
| P16        |    | 64                    | 101 ± 5             |
| P17        |   | 210                   | 86 ± 3              |
| P18        |  | 220                   | 96 ± 4              |
| P20        |  | 130                   | 94 ± 5              |
